# Supplementary material for: Oral administration of erythromycin decreases RNA toxicity in myotonic dystrophy
Source: PubMed Central journal article supplement — Ann Clin Transl Neurol. 2015 Dec 10;3(1):42–54. doi: 10.1002/acn3.271 (PMC4704483; doi:10.1002/acn3.271), 2015-12-10
Supplement: ACN3-3-42-s001.pdf [file ACN3-3-42-s001.pdf]

## MBNL1 sequestration on CUG<sup>exp</sup> in presence of compounds

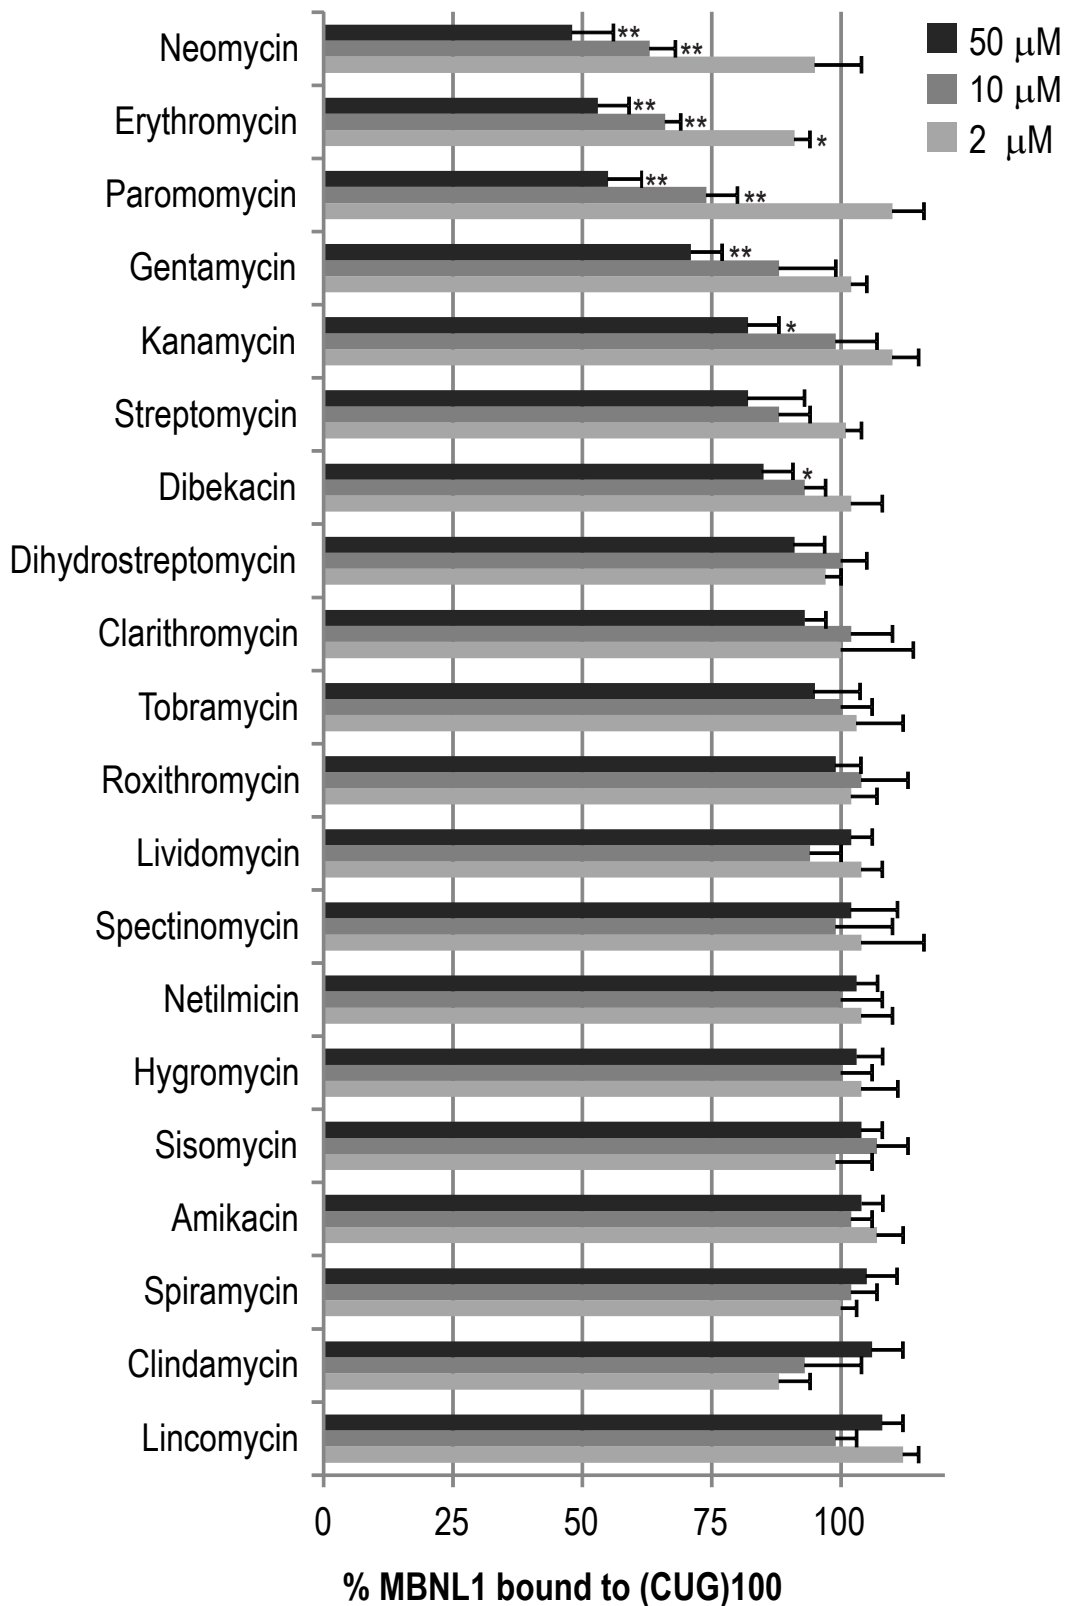

### Supplementary Figure S1.

Results of screening of 20 antibiotics in MBNL1 sequestration assay. Experiments were done for three concentrations of each compound and each experiment was performed in triplicates. The results are mean + SD.
