# Supplementary material for: Oral administration of erythromycin decreases RNA toxicity in myotonic dystrophy
Source: PubMed Central journal article supplement — Ann Clin Transl Neurol. 2015 Dec 10;3(1):42–54. doi: 10.1002/acn3.271 (PMC4704483; doi:10.1002/acn3.271), 2015-12-10
Supplement: ACN3-3-42-s002.pdf [file ACN3-3-42-s002.pdf]

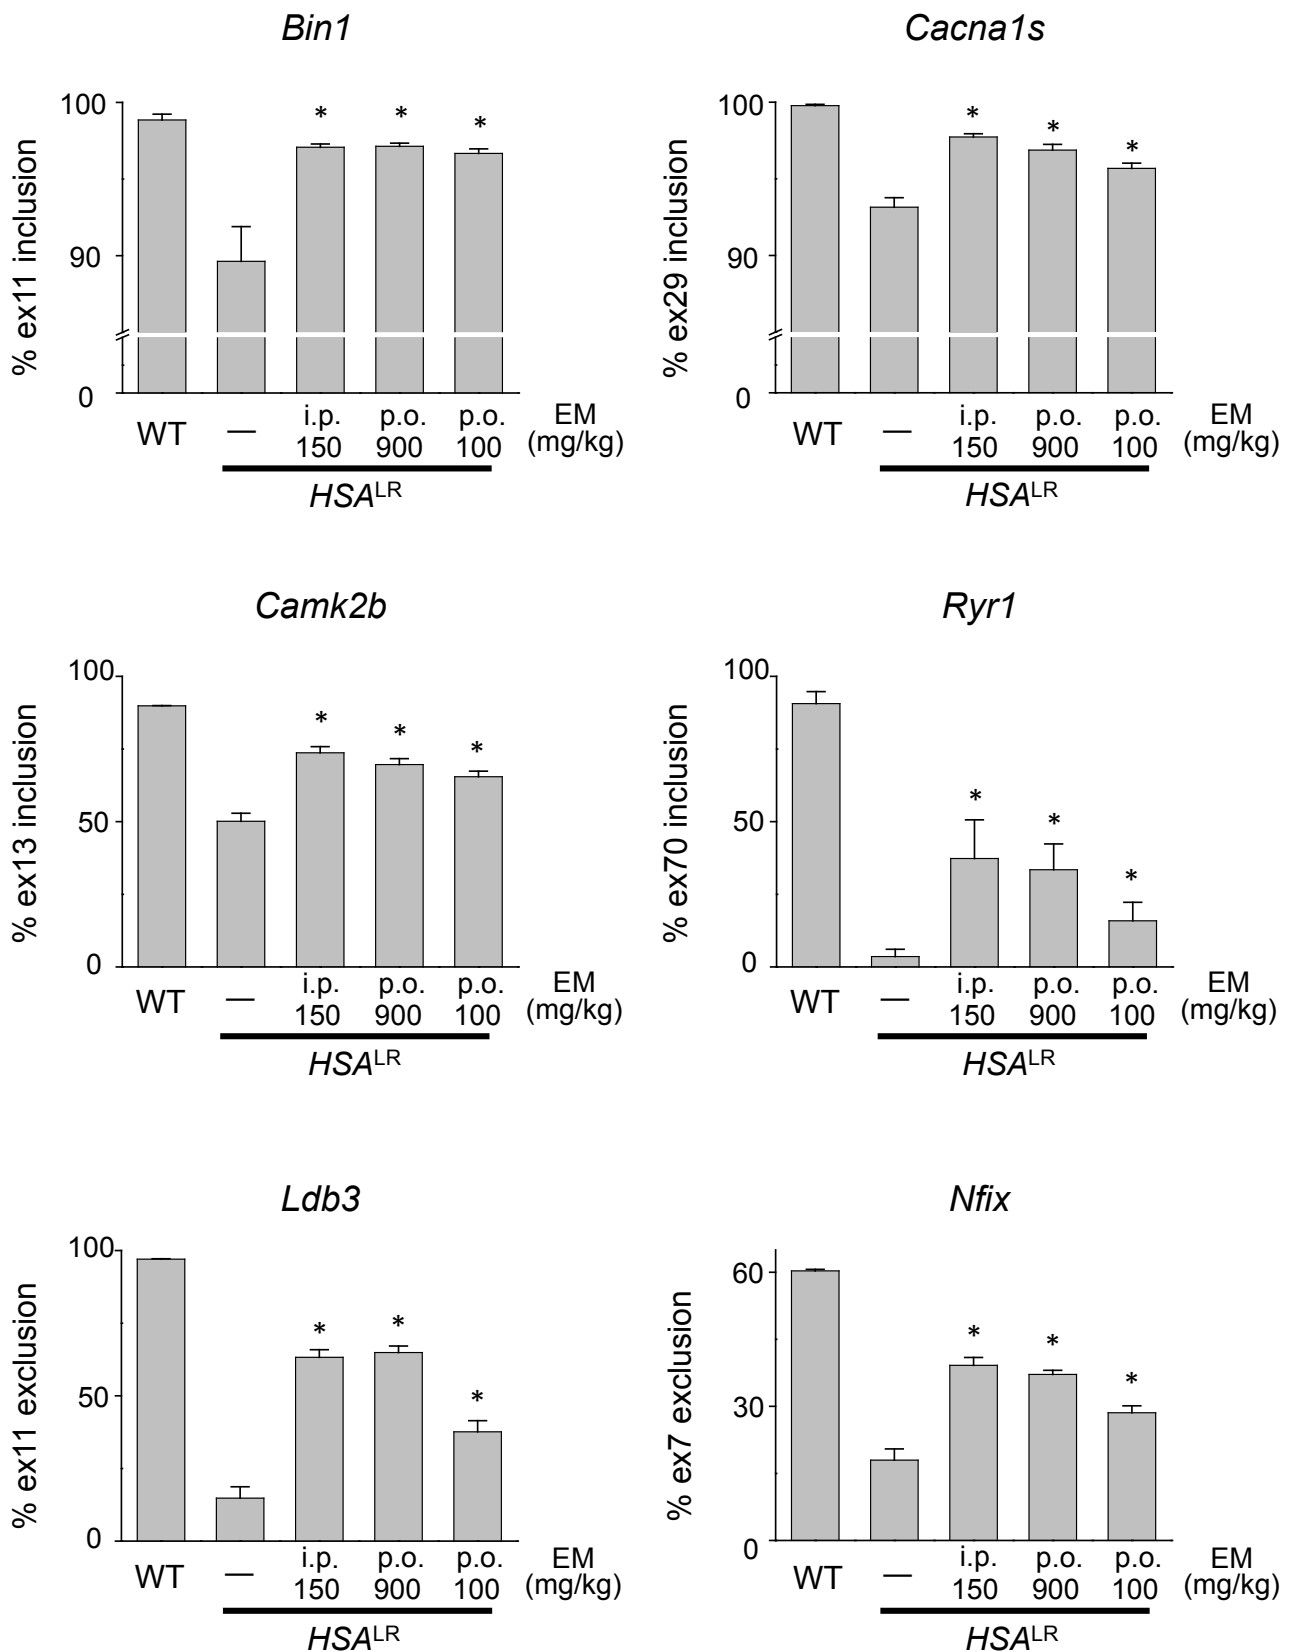

### Supplementary Figure S2.

Analysis of alternative splicing events (*Bin1*, *Cacna1s*, *Camk2b*, *Ryr1*, *Ldb3*, and *Nfix*) by RT-PCR in mice treated with erythromycin (150 mg/kg/day i.p. for 8 days, 900 mg/kg/day p.o. for 5 days, or 100 mg/kg/day p.o. for 21 days;  $n = 6$  for experimental, control, and wild type). \* $P < 0.01$ . Error bars indicate SEM.
